# Supplementary material
Source: Springer Nature journal article supplement (https://www.springermedizin.de/resource/supplementary/12913_2008_999_MOESM2_ESM.pdf/9536104)
Supplement: MOESM2 [file 9536104]

## Enquête du CRI

### Traitements par agents anti-TNF : quel bilan pré-thérapeutique ?

Frédéric Lioté, Thao Pham, Philippe Ravaud

Les traitements anti-TNF sont prescrits chez des patients atteints de PR ou de spondylarthropathies. Les indications sont actuellement libellées selon les AMM. Ils exposent à un certain nombre d'effets secondaires de sévérité variable pour lesquels il n'y a actuellement en France que peu de recommandations de pratiques ou de prescription d'examens pré-thérapeutiques. Chaque clinicien évalue le cas particulier de son patient selon sa propre expérience.

Au nom du CRI, nous vous proposons de répondre à une enquête anonyme à partir d'un cas clinique, simple et rapide, sur vos pratiques cliniques et les mesures que vous prenez chez vos patients avant prescription d'un traitement anti-TNF. Il s'agit de faire un instantané, un état des lieux des pratiques réelles dans notre pays.

---

Age : |\_|\_| ans

Sexe F  M

Année d'obtention de la spécialité : |\_|\_|\_|\_|

Membre de la SFR: Oui  Non

Modalités actuelles d'exercice :

- libéral exclusif
- praticien attaché hospitalier et exercice libéral
- hospitalier temps plein  temps partiel
- hospitalo-universitaire (PU-PH, PHU, MCU-PH)  CCA  interne de spécialité

Avez-vous déjà prescrit vous-même un traitement anti-TNF ?

Oui  Non

Dans le service hospitalier où vous exercez en consultation ou en salle, disposez-vous d'une liste systématique d'items et d'examens à vérifier avant prescription d'un anti-TNF ?

Oui  Non  Ne sait pas

Numéro d'anonymat : B

Femme, 50 ans, polyarthrite rhumatoïde séropositive (FR IgM) depuis 7 ans avec :

- Echappement à une bithérapie MTX (20 mg/sem PO) + Salazopyrine (2 g/j) + corticothérapie de 10 mg/j + AINS conventionnel à pleine dose.
- Antécédents :
  - o ménopause depuis 1 an non substituée, fibro-adénome mammaire
  - o hypothyroïdie secondaire à une maladie de Hashimoto
  - o Fille de 29 ans atteinte de la même dysthyroïdie
  - o Fracture de côte après chute au décours d'un vertige de Ménière
- Examen clinique
  - o Pression artérielle = 120/76, auscultation cardiopulmonaire normale
  - o Absence de nodule rhumatoïde ou de signe de vascularite

Vous voulez traiter cette patiente par un agent anti-TNF. Quel est votre bilan pré-thérapeutique (en dehors du bilan d'activité ou de sévérité de la maladie) ?

1. Quels antécédents recherchez-vous spécifiquement ?

|                                                       |                          |
|-------------------------------------------------------|--------------------------|
| a. primo-infection ou de tuberculose viscérale        | <input type="checkbox"/> |
| b. fractures                                          | <input type="checkbox"/> |
| c. antécédent neurologique                            | <input type="checkbox"/> |
| d. infections ORL                                     | <input type="checkbox"/> |
| e. infections cutanées                                | <input type="checkbox"/> |
| f. néoplasie ou hémopathie                            | <input type="checkbox"/> |
| g. synoviorthèses isotopiques et cortisoniques        | <input type="checkbox"/> |
| h. thrombose veineuse et/ou d'embolie pulmonaire      | <input type="checkbox"/> |
| i. antécédent cardiovasculaire familial               | <input type="checkbox"/> |
| j. cirrhose                                           | <input type="checkbox"/> |
| k. arthrite septique                                  | <input type="checkbox"/> |
| l. septicémie                                         | <input type="checkbox"/> |
| m. bronchopathie chronique                            | <input type="checkbox"/> |
| n. antécédent diabétique familial                     | <input type="checkbox"/> |
| o. fausses-couches spontanées                         | <input type="checkbox"/> |
| p. antécédent néoplasique familial                    | <input type="checkbox"/> |
| q. infections broncho-pulmonaires                     | <input type="checkbox"/> |
| r. infections urinaires                               | <input type="checkbox"/> |
| s. migraine                                           | <input type="checkbox"/> |
| t. notion d'une positivité d'une IDR à la tuberculine | <input type="checkbox"/> |
| u. existence de prothèse dentaire                     | <input type="checkbox"/> |
| v. qualité d'un traitement anti-tuberculeux antérieur | <input type="checkbox"/> |
| w. recherche d'un syndrome de Raynaud                 | <input type="checkbox"/> |
| x. recherche d'une photosensibilité                   | <input type="checkbox"/> |
| y. traitement coronarien et anti-hypertenseur         | <input type="checkbox"/> |
| z. consommation alcool-tabagique                      | <input type="checkbox"/> |
| aa. notion d'une vaccination par le BCG               | <input type="checkbox"/> |
| bb. existence de prothèses articulaires               | <input type="checkbox"/> |

## 2. Quelles données de l'examen physique recueillez-vous ?

|                                          |                          |
|------------------------------------------|--------------------------|
| a. examen ORL                            | <input type="checkbox"/> |
| b. recherche d'un livedo                 | <input type="checkbox"/> |
| c. auscultation cardiaque                | <input type="checkbox"/> |
| d. examen de l'état veineux              | <input type="checkbox"/> |
| e. auscultation pulmonaire               | <input type="checkbox"/> |
| f. examen des nerfs périphériques        | <input type="checkbox"/> |
| g. examen des paires crâniennes          | <input type="checkbox"/> |
| h. examen des aires ganglionnaires       | <input type="checkbox"/> |
| i. recherche d'une vascularite cutanée   | <input type="checkbox"/> |
| j. examen neurologique des voies longues | <input type="checkbox"/> |
| k. état buccodentaire                    | <input type="checkbox"/> |
| l. examen des téguments                  | <input type="checkbox"/> |

## 3. Quels examens biologiques, radiologiques et autres prescrivez-vous ?

|                                                       |                          |
|-------------------------------------------------------|--------------------------|
| a. clichés de sinus (4 incidences)                    | <input type="checkbox"/> |
| b. électrophorèse des protides sériques               | <input type="checkbox"/> |
| c. anticorps anti-CCP                                 | <input type="checkbox"/> |
| d. radiographie pulmonaire                            | <input type="checkbox"/> |
| e. détection des anticorps antinucléaires             | <input type="checkbox"/> |
| f. recherche d'anticoagulant circulant                | <input type="checkbox"/> |
| g. dosage des transaminases                           | <input type="checkbox"/> |
| h. sérologie du CMV                                   | <input type="checkbox"/> |
| i. phénotypage des sous-populations lymphocytaires    | <input type="checkbox"/> |
| j. sérologie du VIH                                   | <input type="checkbox"/> |
| k. prescription d'un ECBU                             | <input type="checkbox"/> |
| l. recherche des anticorps anticardiolipine           | <input type="checkbox"/> |
| m. sérologie du virus d'Epstein-Barr                  | <input type="checkbox"/> |
| n. sérologie d'hépatite C                             | <input type="checkbox"/> |
| o. recherche des anticorps anti-ADN                   | <input type="checkbox"/> |
| p. recherche d'anticorps antihistones                 | <input type="checkbox"/> |
| q. mesure du TP et du TCA/TCK                         | <input type="checkbox"/> |
| r. dosage du complément total, des fractions C3 et C4 | <input type="checkbox"/> |
| s. panoramique dentaire                               | <input type="checkbox"/> |
| t. échocardiographie ?                                | <input type="checkbox"/> |
| u. hémogramme                                         | <input type="checkbox"/> |
| v. glycémie                                           | <input type="checkbox"/> |
| w. prescription d'un scanner des sinus                | <input type="checkbox"/> |
| x. ECG                                                | <input type="checkbox"/> |

## 4. Quelles autres mesures préventives prenez-vous ?

|                                      |                          |
|--------------------------------------|--------------------------|
| a. examen ORL spécialisé             | <input type="checkbox"/> |
| b. consultation pneumologique        | <input type="checkbox"/> |
| c. examen stomatologique spécialisé  | <input type="checkbox"/> |
| d. consultation neurologique         | <input type="checkbox"/> |
| e. consultation cardiologique        | <input type="checkbox"/> |
| f. vaccination anti-grippale         | <input type="checkbox"/> |
| g. IDR à la tuberculine              | <input type="checkbox"/> |
| h. vaccination par le DTTAB          | <input type="checkbox"/> |
| i. vaccination contre le pneumocoque | <input type="checkbox"/> |
